# Supplementary material for: DeepPIG: deep neural network architecture with pairwise connected layers and stochastic gates using knockoff frameworks for feature selection
Source: PubMed Central journal article supplement (PMC11227546; doi:10.1038/s41598-024-66061-6), 2024-07-06
Supplement: 41598_2024_66061_MOESM1_ESM.pdf [file 41598_2024_66061_MOESM1_ESM.pdf]

# DeepPIG: Deep neural network architecture with pairwise connected layers and stochastic gates using knockoff frameworks for feature selection

Euiyoung Oh<sup>1</sup> and Hyunju Lee<sup>1,2,\*</sup>

<sup>1</sup>School of Electrical Engineering and Computer Science, Gwangju Institute of Science and Technology, Gwangju, Republic of Korea

<sup>2</sup>Artificial Intelligence Graduate School, Gwangju Institute of Science and Technology, Gwangju, Republic of Korea

\*Corresponding author. [hyunjulee@gist.ac.kr](mailto:hyunjulee@gist.ac.kr)

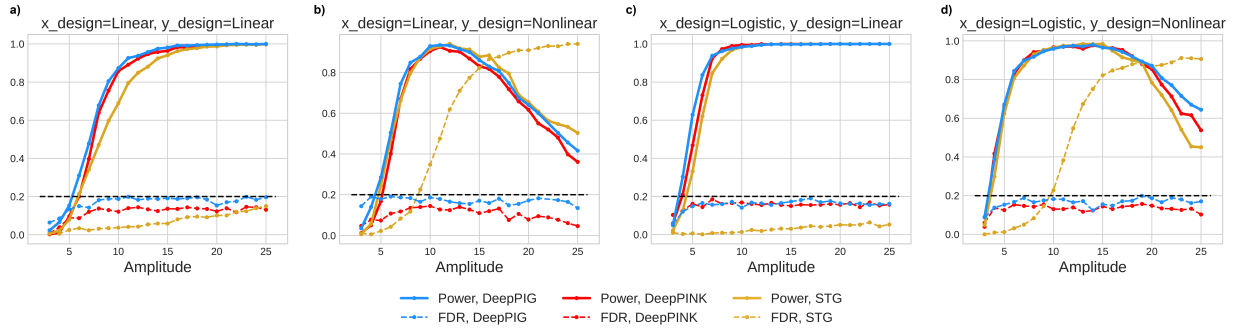

Figure S1: **Simulation study results in a full scale.** (a-d) DeepPIG, DeepPINK, and STG were applied to the synthetic dataset for feature selection. Empirical power and FDR of DeepPIG and DeepPINK were obtained using the knockoff+ threshold. Powers are illustrated in solid lines, and FDR are dashed lines. The preselected FDR target is 0.2, as shown in black dashed lines.

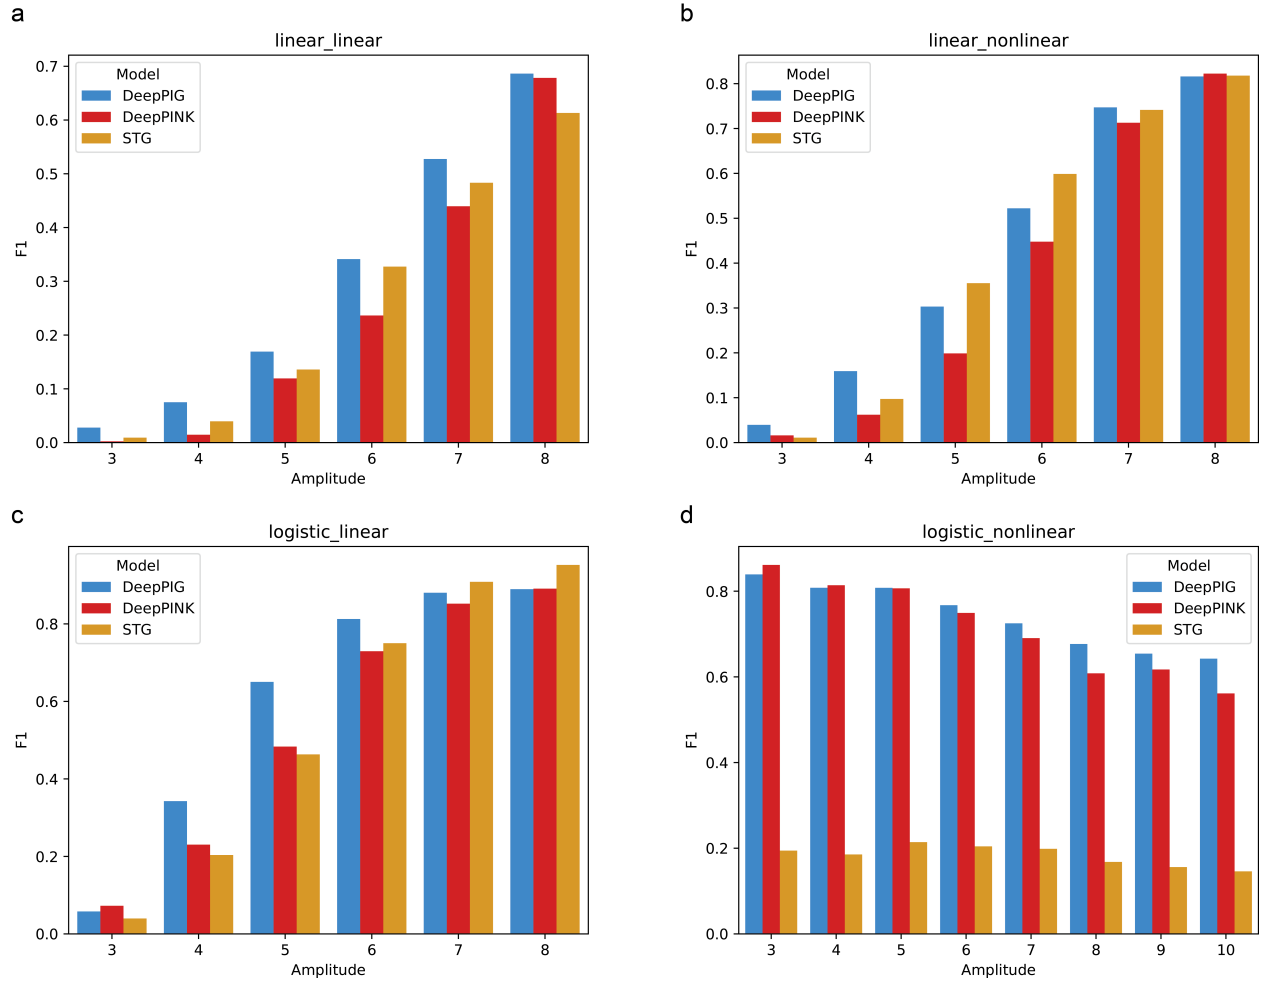

Figure S2: **The average F1 score of the simulation study results (a-d)** DeepPIG, DeepPINK, and STG were applied to the synthetic dataset for feature selection. The average values of 100 repetitions were depicted. DeepPIG showed higher F1 scores when the signals of true features were weak.

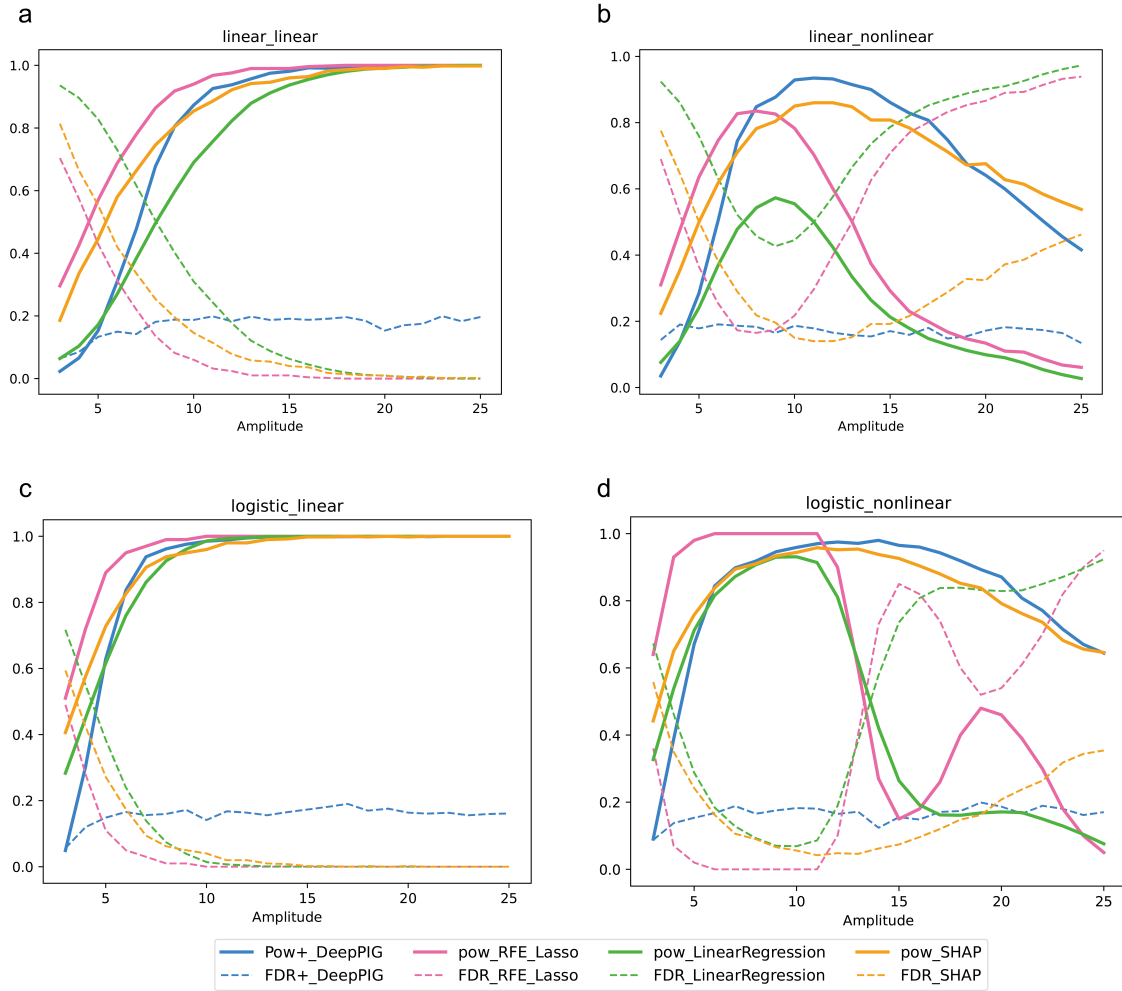

Figure S3: **Feature selection performances of other methods** Linear regression, recursive feature elimination on lasso regression, and SHAP methods were applied to the synthetic datasets. Unlike the knockoff framework, these methods failed to control FDR when the signals of true features were weak.

a

Hyperparameter analysis: Restore epoch

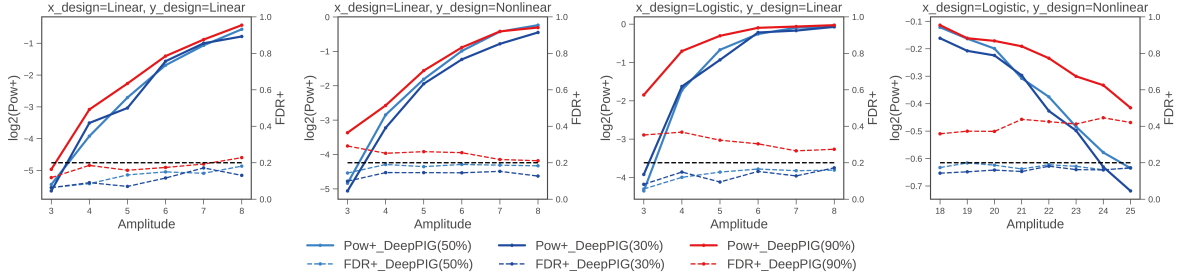

b

Regularization coefficient

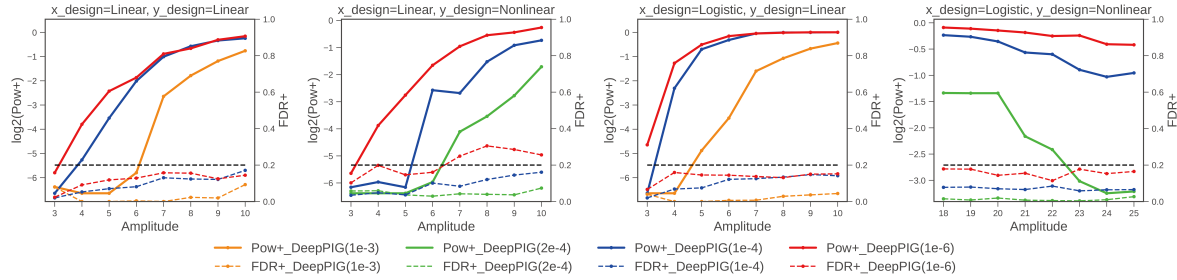

Figure S4: **Hyperparameter analysis** (a) The weight restoration epoch of training phase 1 was varied. When the model was overfitted by original variables only, the knockoff variables got less effect and thus failed to control FDR. (b) The regularization coefficients were varied. The higher values of regularization coefficients tend to select fewer features, decreasing both FDR and power.

Different system, same setting

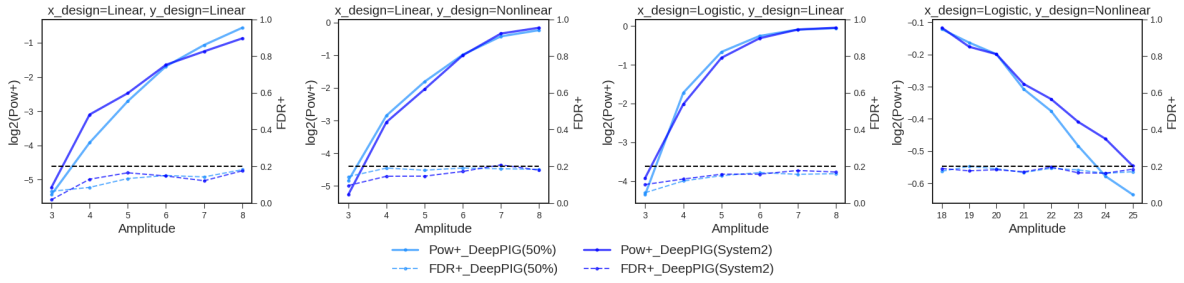

Figure S5: **Replication results on another system** Identical experiments using synthetic datasets were conducted on a different system for replication.

Table S1: Top 100 frequently selected genes in renal adenocarcinoma dataset

| Rank | DeepPIG  |           | DeepPINK |           | Rank | DeepPIG  |           | DeepPINK |           |
|------|----------|-----------|----------|-----------|------|----------|-----------|----------|-----------|
|      | Gene     | Frequency | Gene     | Frequency |      | Gene     | Frequency | Gene     | Frequency |
| 1    | COL11A1  | 0.88      | IFI44    | 0.36      | 51   | NTM      | 0.02      | BLOC1S1  | 0.02      |
| 2    | HGF      | 0.88      | HGF      | 0.27      | 52   | GPX2     | 0.02      | SMIM5    | 0.02      |
| 3    | IFI44    | 0.78      | COL11A1  | 0.23      | 53   | SPAG7    | 0.02      | MCRS1    | 0.02      |
| 4    | LYPD6B   | 0.7       | NTM      | 0.23      | 54   | TCIM     | 0.02      | FKBP1A   | 0.02      |
| 5    | KCNE5    | 0.67      | KCNE5    | 0.18      | 55   | DKKL1    | 0.02      | AQP6     | 0.02      |
| 6    | BCAT1    | 0.63      | NKAIN4   | 0.14      | 56   | GULP1    | 0.02      | GALNT14  | 0.02      |
| 7    | PGC      | 0.5       | LYPD6B   | 0.14      | 57   | TMEM43   | 0.02      | SLFN5    | 0.02      |
| 8    | C16orf89 | 0.38      | PGC      | 0.14      | 58   | DCXR     | 0.01      | ITPRIPL2 | 0.02      |
| 9    | HSPB7    | 0.25      | BCAT1    | 0.11      | 59   | SERINC3  | 0.01      | CALU     | 0.02      |
| 10   | APOD     | 0.24      | IRS4     | 0.11      | 60   | NR0B2    | 0.01      | RASSF7   | 0.02      |
| 11   | DDX42    | 0.22      | MYOF     | 0.11      | 61   | KNG1     | 0.01      | BSND     | 0.02      |
| 12   | SELENBP1 | 0.21      | SELENBP1 | 0.11      | 62   | PCYT2    | 0.01      | URM1     | 0.02      |
| 13   | CEMIP    | 0.2       | CEMIP    | 0.11      | 63   | TMEM141  | 0.01      | TNFRSF1A | 0.02      |
| 14   | IRS4     | 0.15      | MARS     | 0.09      | 64   | CBLC     | 0.01      | P3H2     | 0.02      |
| 15   | FKBP1A   | 0.13      | DKKL1    | 0.09      | 65   | PCP4     | 0.01      | TCIM     | 0.02      |
| 16   | DGKD     | 0.13      | ADAM33   | 0.07      | 66   | ITIH5    | 0.01      | FMNL3    | 0.02      |
| 17   | PI3      | 0.12      | C16orf89 | 0.07      | 67   | CETP     | 0.01      | GXYLT2   | 0.02      |
| 18   | PHPT1    | 0.11      | KPNA2    | 0.07      | 68   | HHATL    | 0.01      | MPZL2    | 0.02      |
| 19   | ADAM33   | 0.09      | PHPT1    | 0.05      | 69   | MUC1     | 0.01      | REPS2    | 0.02      |
| 20   | DNAJC3   | 0.09      | CALCA    | 0.05      | 70   | NRP1     | 0.01      | C7orf50  | 0.02      |
| 21   | S100A14  | 0.08      | NR0B2    | 0.05      | 71   | SCGB1D2  | 0.01      | EFR3A    | 0.02      |
| 22   | TNFRSF1A | 0.08      | HHATL    | 0.05      | 72   | RPP25L   | 0.01      | EXOSC5   | 0.02      |
| 23   | GOLT1A   | 0.07      | IGFBP2   | 0.05      | 73   | MCRS1    | 0.01      | DNAJC3   | 0.02      |
| 24   | MPZL2    | 0.06      | WFDC5    | 0.05      | 74   | SF3B3    | 0.01      | CARD19   | 0.02      |
| 25   | SLPI     | 0.05      | UBAC1    | 0.05      | 75   | NDUFAF8  | 0.01      | SEMA4C   | 0.02      |
| 26   | WFDC5    | 0.05      | IFI16    | 0.05      | 76   | RHOD     | 0.01      | NRDC     | 0.02      |
| 27   | F8       | 0.04      | KLK1     | 0.05      | 77   | HNRNPUL1 | 0.01      | CRYBG1   | 0.02      |
| 28   | SFRP2    | 0.04      | GADD45G  | 0.05      | 78   | ERO1A    | 0.01      | ATP13A2  | 0.02      |
| 29   | CFLAR    | 0.04      | GOLT1A   | 0.05      | 79   | ITPRIPL2 | 0.01      | KHSRP    | 0.02      |
| 30   | IL1RL1   | 0.04      | DGKD     | 0.05      | 80   | P3H2     | 0.01      | SEMA6B   | 0.02      |
| 31   | NCSTN    | 0.04      | S100A14  | 0.02      | 81   | PLOD1    | 0.01      | STT3A    | 0.02      |
| 32   | MYOF     | 0.04      | LCN2     | 0.02      | 82   | C7orf50  | 0.01      | NFE2L3   | 0.02      |
| 33   | KPNA2    | 0.04      | HOXB9    | 0.02      | 83   | EFR3A    | 0.01      | DCXR     | 0         |
| 34   | STT3A    | 0.04      | GCGR     | 0.02      | 84   | EGFR     | 0.01      | STC1     | 0         |
| 35   | MARS     | 0.03      | KNG1     | 0.02      | 85   | TGOLN2   | 0.01      | SSNA1    | 0         |
| 36   | LRRN2    | 0.03      | RAB25    | 0.02      | 86   | RNF145   | 0.01      | MYD88    | 0         |
| 37   | ITGB3    | 0.03      | KCNJ1    | 0.02      | 87   | WDR34    | 0.01      | CLCNKA   | 0         |
| 38   | SIRPA    | 0.03      | IGFBP3   | 0.02      | 88   | FBXO2    | 0.01      | ABCC1    | 0         |
| 39   | PDZD2    | 0.03      | OAS2     | 0.02      | 89   | HSP90B1  | 0.01      | SLPI     | 0         |
| 40   | CPE      | 0.03      | LAMA4    | 0.02      | 90   | HYOU1    | 0.01      | WFDC2    | 0         |
| 41   | PALM     | 0.03      | CLEC2B   | 0.02      | 91   | CRYBG1   | 0.01      | PRDM1    | 0         |
| 42   | KLK1     | 0.03      | F8       | 0.02      | 92   | PPIL3    | 0.01      | SERINC3  | 0         |
| 43   | LBR      | 0.03      | SFRP2    | 0.02      | 93   | EPS8L1   | 0.01      | ARHGAP31 | 0         |
| 44   | ADAM15   | 0.03      | CFLAR    | 0.02      | 94   | DES1     | 0.01      | ZNFX1    | 0         |
| 45   | ABCC1    | 0.02      | DPM2     | 0.02      | 95   | STC1     | 0         | COQ4     | 0         |
| 46   | OAS2     | 0.02      | IL1RL1   | 0.02      | 96   | SSNA1    | 0         | HAVCR1   | 0         |
| 47   | NKAIN4   | 0.02      | ITGB3    | 0.02      | 97   | MYD88    | 0         | PCYT2    | 0         |
| 48   | CX3CR1   | 0.02      | HNRNPM   | 0.02      | 98   | CLCNKA   | 0         | TRPT1    | 0         |
| 49   | IGFBP2   | 0.02      | SLC6A6   | 0.02      | 99   | LCN2     | 0         | GRB10    | 0         |
| 50   | VEGFC    | 0.02      | COX7A1   | 0.02      | 100  | CALCA    | 0         | MSN      | 0         |

Table S2: Top 100 frequently selected genes in hepatocellular carcinoma dataset

| Rank | DeepPIG  |           | DeepPINK |           | Rank | DeepPIG  |           | DeepPINK |           |
|------|----------|-----------|----------|-----------|------|----------|-----------|----------|-----------|
|      | Gene     | Frequency | Gene     | Frequency |      | Gene     | Frequency | Gene     | Frequency |
| 1    | PLOD2    | 0.87      | PLOD2    | 0.33      | 51   | GMNN     | 0.02      | ITPA     | 0.04      |
| 2    | STC2     | 0.67      | ADAM9    | 0.25      | 52   | CHAC1    | 0.02      | NCSTN    | 0.04      |
| 3    | TMX1     | 0.6       | GCLM     | 0.23      | 53   | MRPL41   | 0.02      | RBBP7    | 0.04      |
| 4    | ADAM9    | 0.49      | STC2     | 0.23      | 54   | CYP2C8   | 0.02      | CANX     | 0.04      |
| 5    | PARD3    | 0.41      | PIK3IP1  | 0.19      | 55   | CCNE1    | 0.02      | ME3      | 0.02      |
| 6    | IFI6     | 0.34      | MRPL3    | 0.16      | 56   | MX1      | 0.02      | GMNN     | 0.02      |
| 7    | MERTK    | 0.31      | ZWINT    | 0.16      | 57   | PKN1     | 0.02      | MYBBP1A  | 0.02      |
| 8    | GCLM     | 0.3       | PARD3    | 0.14      | 58   | RTKN     | 0.02      | PRMT1    | 0.02      |
| 9    | IGFBP3   | 0.29      | GTPBP4   | 0.12      | 59   | PFN1     | 0.02      | IGFBP3   | 0.02      |
| 10   | C5       | 0.26      | MEX3D    | 0.12      | 60   | RBP1     | 0.02      | LRRC42   | 0.02      |
| 11   | MEX3D    | 0.25      | TMX1     | 0.12      | 61   | PHLDA1   | 0.02      | TGIF1    | 0.02      |
| 12   | ECHDC1   | 0.24      | CDK1     | 0.12      | 62   | LGALS1   | 0.02      | LASP1    | 0.02      |
| 13   | LYZ      | 0.2       | ENG      | 0.11      | 63   | FCER1G   | 0.02      | TRIM14   | 0.02      |
| 14   | HLA-DQA1 | 0.2       | E2F1     | 0.11      | 64   | TYROBP   | 0.02      | CHAC1    | 0.02      |
| 15   | CMBL     | 0.19      | MERTK    | 0.11      | 65   | PFKM     | 0.02      | ATAD3A   | 0.02      |
| 16   | ZC3H7B   | 0.14      | EIF3M    | 0.09      | 66   | EXT1     | 0.02      | DVL3     | 0.02      |
| 17   | PIK3IP1  | 0.14      | C5       | 0.09      | 67   | CIAO1    | 0.02      | GNL3     | 0.02      |
| 18   | GTPBP4   | 0.13      | OAS1     | 0.07      | 68   | TCEA1    | 0.02      | ESYT1    | 0.02      |
| 19   | ERF      | 0.13      | NUDC     | 0.07      | 69   | ADK      | 0.02      | ECHDC1   | 0.02      |
| 20   | OAS1     | 0.12      | CCT6A    | 0.07      | 70   | DNAJA2   | 0.01      | SNX10    | 0.02      |
| 21   | ISM1     | 0.11      | DNAJA2   | 0.05      | 71   | PLIN1    | 0.01      | SLC41A1  | 0.02      |
| 22   | ERMP1    | 0.11      | IFI6     | 0.05      | 72   | MYBBP1A  | 0.01      | RFTN1    | 0.02      |
| 23   | PZP      | 0.11      | CDCA5    | 0.05      | 73   | PEMT     | 0.01      | ERMP1    | 0.02      |
| 24   | ZWINT    | 0.1       | ELK3     | 0.05      | 74   | SSBP3    | 0.01      | DDX21    | 0.02      |
| 25   | CCT6A    | 0.1       | NCOA5    | 0.05      | 75   | LRRC42   | 0.01      | CCNL2    | 0.02      |
| 26   | FLRT3    | 0.09      | ICMT     | 0.05      | 76   | B3GNT2   | 0.01      | ONECUT2  | 0.02      |
| 27   | RNF185   | 0.09      | IL4I1    | 0.05      | 77   | NCOA3    | 0.01      | JAZF1    | 0.02      |
| 28   | DHCR7    | 0.09      | RNF185   | 0.05      | 78   | RPS6KB2  | 0.01      | DEK      | 0.02      |
| 29   | LYN      | 0.09      | DHCR7    | 0.05      | 79   | TSTD1    | 0.01      | CYTH1    | 0.02      |
| 30   | ARHGDIB  | 0.08      | LRIG3    | 0.05      | 80   | ESYT1    | 0.01      | PHLDA1   | 0.02      |
| 31   | RSAD1    | 0.08      | CIAO1    | 0.05      | 81   | GRAMD4   | 0.01      | TBC1D22A | 0.02      |
| 32   | EIF3M    | 0.08      | KIAA0040 | 0.05      | 82   | FERMT3   | 0.01      | MAN1B1   | 0.02      |
| 33   | MRPS18B  | 0.08      | ISM1     | 0.04      | 83   | ABCC6    | 0.01      | DSG2     | 0.02      |
| 34   | S1PR2    | 0.07      | RPL29    | 0.04      | 84   | C4B      | 0.01      | ABCF3    | 0.02      |
| 35   | NCSTN    | 0.07      | ITGB4    | 0.04      | 85   | SLC41A1  | 0.01      | EXT1     | 0.02      |
| 36   | HMOX2    | 0.07      | ZC3H7B   | 0.04      | 86   | SDHC     | 0.01      | TTC1     | 0.02      |
| 37   | E2F1     | 0.05      | PEX11G   | 0.04      | 87   | IL4I1    | 0.01      | PZP      | 0.02      |
| 38   | NUDC     | 0.05      | DPYS     | 0.04      | 88   | ACTN1    | 0.01      | FBXW11   | 0.02      |
| 39   | DPYS     | 0.04      | GRAMD4   | 0.04      | 89   | RGS1     | 0.01      | HLA-DQA1 | 0.02      |
| 40   | MRPL3    | 0.04      | ABCC6    | 0.04      | 90   | MRPL10   | 0.01      | YIPF5    | 0.02      |
| 41   | ELK3     | 0.04      | SLC5A6   | 0.04      | 91   | ONECUT2  | 0.01      | PDZD11   | 0.02      |
| 42   | CCNL2    | 0.04      | TMPRSS6  | 0.04      | 92   | LRIG3    | 0.01      | ERF      | 0.02      |
| 43   | YIPF5    | 0.04      | ACTN1    | 0.04      | 93   | FOLR2    | 0.01      | NIF3L1   | 0.02      |
| 44   | SCNM1    | 0.03      | DDX54    | 0.04      | 94   | CBX1     | 0.01      | HMOX2    | 0.02      |
| 45   | FURIN    | 0.03      | UBE2M    | 0.04      | 95   | TBC1D22A | 0.01      | TIMM44   | 0.02      |
| 46   | NCOA5    | 0.03      | RGS1     | 0.04      | 96   | ZMIZ1    | 0.01      | ALDH1L1  | 0.02      |
| 47   | SSR4     | 0.03      | CBX1     | 0.04      | 97   | MAN1B1   | 0.01      | A1CF     | 0         |
| 48   | ABCF3    | 0.03      | ZMIZ1    | 0.04      | 98   | MLLT1    | 0.01      | CMBL     | 0         |
| 49   | CDK1     | 0.03      | FCER1G   | 0.04      | 99   | DSG2     | 0.01      | SLC5A9   | 0         |
| 50   | CANX     | 0.03      | PFKM     | 0.04      | 100  | FUBP3    | 0.01      | VIL1     | 0         |



Table S3: Top 100 frequently selected genes in pancreatic adenocarcinoma dataset

| Rank | DeepPIG   |           | DeepPINK  |           | Rank | DeepPIG  |           | DeepPINK |           |
|------|-----------|-----------|-----------|-----------|------|----------|-----------|----------|-----------|
|      | Gene      | Frequency | Gene      | Frequency |      | Gene     | Frequency | Gene     | Frequency |
| 1    | C15orf48  | 0.8       | C15orf48  | 0.48      | 51   | DAG1     | 0.01      | CRB3     | 0.04      |
| 2    | RRAD      | 0.7       | RRAD      | 0.26      | 52   | FAM189B  | 0.01      | IMP4     | 0         |
| 3    | PSMB8     | 0.52      | PSMB8     | 0.26      | 53   | EIF3G    | 0.01      | FGFR4    | 0         |
| 4    | GPBAR1    | 0.45      | USP22     | 0.19      | 54   | NEO1     | 0.01      | P4HA1    | 0         |
| 5    | MAP1LC3B  | 0.43      | RCOR1     | 0.19      | 55   | LSM10    | 0.01      | PPP2R1A  | 0         |
| 6    | PPP1R10   | 0.39      | FAM19A5   | 0.19      | 56   | OSCAR    | 0.01      | BAX      | 0         |
| 7    | TGFBR3    | 0.27      | PPP1R10   | 0.19      | 57   | LGALS2   | 0.01      | NAXE     | 0         |
| 8    | UGT2B15   | 0.19      | HIST1H2AC | 0.15      | 58   | LAMB3    | 0.01      | YRDC     | 0         |
| 9    | SH3BP4    | 0.19      | SOX9      | 0.15      | 59   | ADH6     | 0.01      | RCC1L    | 0         |
| 10   | UGT2B17   | 0.18      | GPBAR1    | 0.11      | 60   | CENPB    | 0.01      | SEC23A   | 0         |
| 11   | VAV1      | 0.18      | MBOAT2    | 0.11      | 61   | SYNGR1   | 0.01      | MXD4     | 0         |
| 12   | ZSWIM7    | 0.14      | FAM189B   | 0.11      | 62   | ZNF217   | 0.01      | UBE2B    | 0         |
| 13   | HNRNPUL1  | 0.13      | CITED4    | 0.11      | 63   | KLHDC3   | 0.01      | ZC3H7B   | 0         |
| 14   | DDAH1     | 0.12      | NEO1      | 0.11      | 64   | THAP4    | 0.01      | DAG1     | 0         |
| 15   | FAM19A5   | 0.11      | UGT2B15   | 0.11      | 65   | SLK      | 0.01      | TMEM147  | 0         |
| 16   | KIAA0100  | 0.11      | AFAP1L2   | 0.11      | 66   | PEX5     | 0.01      | CYS1     | 0         |
| 17   | MBOAT2    | 0.1       | LAMB3     | 0.11      | 67   | CBX7     | 0.01      | EIF3G    | 0         |
| 18   | KCNQ1     | 0.08      | SYNGR1    | 0.11      | 68   | CRB3     | 0.01      | DNPEP    | 0         |
| 19   | DUSP1     | 0.08      | FGD6      | 0.11      | 69   | FGD6     | 0.01      | CLPP     | 0         |
| 20   | DPY19L1   | 0.07      | FNDC3B    | 0.07      | 70   | RPS11    | 0.01      | CASTOR2  | 0         |
| 21   | AFAP1L2   | 0.07      | UGT2B17   | 0.07      | 71   | ZNF768   | 0.01      | DUSP1    | 0         |
| 22   | CLK1      | 0.07      | AHNAK2    | 0.07      | 72   | FCGBP    | 0         | OSCAR    | 0         |
| 23   | PPP2R1A   | 0.06      | PAFAH1B3  | 0.07      | 73   | IMP4     | 0         | GJB1     | 0         |
| 24   | USP22     | 0.06      | SLC25A23  | 0.07      | 74   | BAX      | 0         | ADM      | 0         |
| 25   | MLLT1     | 0.06      | B4GAT1    | 0.07      | 75   | PAFAH1B3 | 0         | NAGLU    | 0         |
| 26   | GJB1      | 0.06      | MLLT1     | 0.07      | 76   | SEC23A   | 0         | LGALS2   | 0         |
| 27   | HIST1H2AC | 0.06      | KIAA0100  | 0.07      | 77   | MXD4     | 0         | NDUFAF8  | 0         |
| 28   | CAPN6     | 0.06      | SLK       | 0.07      | 78   | ANGPTL4  | 0         | HS6ST1   | 0         |
| 29   | RCC1L     | 0.05      | FCGBP     | 0.04      | 79   | FAM8A1   | 0         | AQP1     | 0         |
| 30   | SLC25A23  | 0.05      | ZSWIM7    | 0.04      | 80   | ZC3H7B   | 0         | TMSB10   | 0         |
| 31   | NAGLU     | 0.05      | MAP1LC3B  | 0.04      | 81   | TMEM147  | 0         | BHLHE40  | 0         |
| 32   | PEPD      | 0.05      | KCNQ1     | 0.04      | 82   | CYS1     | 0         | HNRNPUL1 | 0         |
| 33   | AHNAK2    | 0.04      | ANGPTL4   | 0.04      | 83   | DNPEP    | 0         | CENPB    | 0         |
| 34   | CITED4    | 0.04      | DPY19L1   | 0.04      | 84   | SLC24A3  | 0         | VAV1     | 0         |
| 35   | RCOR1     | 0.04      | FAM8A1    | 0.04      | 85   | CLPP     | 0         | KIAA1324 | 0         |
| 36   | HNF1B     | 0.04      | SOX18     | 0.04      | 86   | CASTOR2  | 0         | MPC2     | 0         |
| 37   | FNDC3B    | 0.02      | SLC24A3   | 0.04      | 87   | ADM      | 0         | SLC20A1  | 0         |
| 38   | YRDC      | 0.02      | GATA6     | 0.04      | 88   | NDUFAF8  | 0         | ZNF217   | 0         |
| 39   | GATA6     | 0.02      | LSM10     | 0.04      | 89   | AQP1     | 0         | CAPN6    | 0         |
| 40   | RNF5      | 0.02      | HNF1B     | 0.04      | 90   | TMSB10   | 0         | KLHDC3   | 0         |
| 41   | HS6ST1    | 0.02      | RNF5      | 0.04      | 91   | BHLHE40  | 0         | THAP4    | 0         |
| 42   | PFKP      | 0.02      | ADH6      | 0.04      | 92   | KIAA1324 | 0         | FGFR2    | 0         |
| 43   | RHOA      | 0.02      | CLK1      | 0.04      | 93   | MPC2     | 0         | PEX5     | 0         |
| 44   | CMTM8     | 0.02      | DDAH1     | 0.04      | 94   | SLC20A1  | 0         | VEGFA    | 0         |
| 45   | FGFR4     | 0.01      | SH3BP4    | 0.04      | 95   | ABLIM3   | 0         | TBCC     | 0         |
| 46   | P4HA1     | 0.01      | PFKP      | 0.04      | 96   | DBI      | 0         | RHOA     | 0         |
| 47   | NAXE      | 0.01      | ABLIM3    | 0.04      | 97   | FGFR2    | 0         | RPS11    | 0         |
| 48   | UBE2B     | 0.01      | DBI       | 0.04      | 98   | VEGFA    | 0         | ZNF768   | 0         |
| 49   | SOX18     | 0.01      | CBX7      | 0.04      | 99   | SOX9     | 0         | CMTM8    | 0         |
| 50   | B4GAT1    | 0.01      | TGFBR3    | 0.04      | 100  | TBCC     | 0         | PEPD     | 0         |

Table S4: Frequently selected features using human microbiome dataset for colorectal cancer

| Rank | DeepPIG                          |                | DeepPINK                         |                |
|------|----------------------------------|----------------|----------------------------------|----------------|
|      | Feature name                     | # of selection | Feature name                     | # of selection |
| 1    | Dialister pneumosintes           | 100            | Dialister pneumosintes           | 97             |
| 2    | Eikenella corrodens              | 99             | Eikenella corrodens              | 89             |
| 3    | Parvimonas micra                 | 94             | Intestinimonas butyriciproducens | 79             |
| 4    | Intestinimonas butyriciproducens | 90             | Staphylococcus haemolyticus      | 77             |
| 5    | Staphylococcus haemolyticus      | 90             | Bacteroides fragilis             | 60             |
| 6    | Clostridium bornimense           | 73             | Clostridium bornimense           | 53             |
| 7    | Bacteroides fragilis             | 71             | Parvimonas micra                 | 52             |
| 8    | Latilactobacillus sakei          | 68             | Latilactobacillus sakei          | 48             |
| 9    | Clostridium chauvoei             | 62             | Clostridium chauvoei             | 46             |
| 10   | Gemella sp. oral taxon 928       | 61             | Gemella sp. oral taxon 928       | 36             |
| 11   | Corynebacterium sp. NML98-0116   | 50             | Akkermansia muciniphila          | 36             |
| 12   | Ndongobacter massiliensis        | 45             | Streptococcus sp. A12            | 34             |
| 13   | Akkermansia muciniphila          | 45             | Corynebacterium sp. NML98-0116   | 33             |
| 14   | Streptococcus sp. A12            | 44             | Ndongobacter massiliensis        | 31             |
| 15   | Lactococcus garvieae             | 36             | Prevotella intermedia            | 30             |
| 16   | Prevotella intermedia            | 35             | Anaerococcus mediterraneensis    | 30             |
| 17   | Anaerococcus mediterraneensis    | 34             | Fusobacterium varium             | 29             |
| 18   | Escherichia phage HK629          | 33             | Lactococcus garvieae             | 29             |
| 19   | Aggregatibacter aphrophilus      | 30             | Ruminococcus bicirculans         | 26             |
| 20   | Peptoniphilus sp. ING2-D1G       | 28             | Escherichia phage HK629          | 24             |
| 21   | Ezakiella massiliensis           | 27             | Ezakiella massiliensis           | 22             |
| 22   | Ruminococcus bicirculans         | 26             | Peptoniphilus sp. ING2-D1G       | 16             |
| 23   | Desulfovibrio fairfieldensis     | 25             | Aggregatibacter aphrophilus      | 16             |
| 24   | Fusobacterium varium             | 23             | Haemophilus pittmaniae           | 15             |
| 25   | Cloacibacillus porcorum          | 22             | Cloacibacillus porcorum          | 14             |
| 26   | Haemophilus pittmaniae           | 17             | Streptococcus pyogenes           | 12             |
| 27   | Streptococcus pyogenes           | 16             | Clostridium sp. SY8519           | 10             |
| 28   | Clostridium sp. SY8519           | 11             | Desulfovibrio fairfieldensis     | 9              |
| 29   | Bacteroides cellulosilyticus     | 7              | Faecalibacterium prausnitzii     | 9              |
| 30   | Faecalibacterium prausnitzii     | 7              | Bacteroides cellulosilyticus     | 4              |

Table S5: Frequently selected features using human single-cell dataset for glioblastoma

| Rank | DeepPIG  |                | DeepPINK |                |
|------|----------|----------------|----------|----------------|
|      | Gene     | # of selection | Gene     | # of selection |
| 1    | SPARCL1  | 70             | ATP1A2   | 56             |
| 2    | QPCT     | 62             | PRODH    | 43             |
| 3    | PRODH    | 60             | IGSF21   | 43             |
| 4    | SERPINE2 | 57             | HES6     | 42             |
| 5    | ATP1A2   | 54             | SPARCL1  | 33             |
| 6    | B2M      | 47             | ALDOC    | 31             |
| 7    | PSRC1    | 46             | PPM1K    | 31             |
| 8    | ALDOC    | 44             | CNTN1    | 30             |
| 9    | BAALC    | 44             | SERPINE2 | 30             |
| 10   | IGSF21   | 43             | HIF3A    | 26             |
| 11   | EFHD1    | 42             | HSPB8    | 26             |
| 12   | C1R      | 42             | NPL      | 25             |
| 13   | LRRIQ1   | 37             | TMEM98   | 22             |
| 14   | ELOB     | 36             | ALDH2    | 22             |
| 15   | HSPB8    | 36             | CCND2    | 22             |
| 16   | CCND2    | 33             | ACSS1    | 22             |
| 17   | HES6     | 33             | PPARGC1A | 21             |
| 18   | PPM1K    | 31             | PLPPR4   | 21             |
| 19   | ETNPPL   | 30             | MSMO1    | 20             |
| 20   | CFH      | 29             | CFH      | 19             |
| 21   | PPARGC1A | 29             | FGFR3    | 19             |
| 22   | SYT9     | 29             | ATP5F1B  | 19             |
| 23   | PCSK1N   | 26             | EFHD1    | 19             |
| 24   | ALDH2    | 26             | NTRK2    | 18             |
| 25   | FGFR3    | 25             | TTPA     | 17             |
| 26   | OAZ1     | 25             | BRINP3   | 17             |
| 27   | UBXN10   | 25             | LRRIQ1   | 15             |
| 28   | TMEM98   | 23             | IFI44L   | 15             |
| 29   | GRID2    | 23             | VCAN     | 14             |
| 30   | C16orf89 | 23             | QPCT     | 14             |
| 31   | NKAIN4   | 22             | ATP1B2   | 14             |
| 32   | ATP5F1B  | 22             | LPAR6    | 14             |
| 33   | SNX3     | 22             | GRID2    | 14             |
| 34   | NPL      | 22             | PARM1    | 14             |
| 35   | IFI44L   | 22             | LMO3     | 13             |
| 36   | CNTN1    | 21             | NKAIN4   | 13             |
| 37   | CPE      | 21             | GLCCI1   | 12             |
| 38   | MEGF10   | 20             | ACADM    | 12             |
| 39   | ACSS1    | 20             | ASCL1    | 12             |
| 40   | PARM1    | 20             | UBXN10   | 12             |
| 41   | VCAN     | 19             | SYT9     | 12             |
| 42   | BRINP3   | 19             | OAS1     | 11             |
| 43   | IDI1     | 18             | CPXM2    | 11             |
| 44   | TRAF4    | 18             | SLC14A1  | 11             |
| 45   | SCG3     | 18             | SLC18B1  | 11             |
| 46   | PLPPR4   | 18             | IDI1     | 10             |
| 47   | HIF3A    | 17             | SCG3     | 10             |
| 48   | TTPA     | 17             | PSRC1    | 10             |
| 49   | OLFML2B  | 17             | SPX      | 10             |
| 50   | CPXM2    | 16             | ALDH1L1  | 10             |

Table S6: Frequently selected features using murine single-cell dataset for  $\text{nf-}\kappa\text{b}$  expression and lipopolysaccharides response

| Rank | DeepPIG       |                | DeepPINK      |                |
|------|---------------|----------------|---------------|----------------|
|      | Gene          | # of selection | Gene          | # of selection |
| 1    | Sqstm1        | 99             | Sqstm1        | 84             |
| 2    | Hsp90aa1      | 98             | Hspa8         | 83             |
| 3    | Sod2          | 95             | Sdc4          | 78             |
| 4    | Sdc4          | 95             | Hsp90aa1      | 76             |
| 5    | Tnfaip2       | 94             | Sod2          | 75             |
| 6    | Hmox1         | 93             | Gmn           | 62             |
| 7    | Hspa8         | 93             | Srsf5         | 61             |
| 8    | Chordc1       | 91             | Tnfaip2       | 61             |
| 9    | Gadd45b       | 89             | Fdft1         | 55             |
| 10   | Srsf5         | 89             | 2010111I01Rik | 51             |
| 11   | Gmn           | 88             | Hmox1         | 49             |
| 12   | Ccl3          | 85             | Ly86          | 46             |
| 13   | 2010111I01Rik | 82             | Odc1          | 45             |
| 14   | Odc1          | 80             | Chordc1       | 43             |
| 15   | Fdft1         | 79             | Gadd45b       | 43             |
| 16   | Fosb          | 77             | Sulf2         | 40             |
| 17   | Txnrd1        | 77             | Hmgcr         | 40             |
| 18   | Cyp51         | 73             | Rel           | 39             |
| 19   | Cd40          | 73             | Esd           | 39             |
| 20   | Zmiz1         | 71             | Dynll1        | 38             |
| 21   | Ly86          | 71             | Txnrd1        | 37             |
| 22   | Rel           | 69             | Ccl3          | 36             |
| 23   | Kdm6b         | 67             | Cyp51         | 34             |
| 24   | Slc4a7        | 67             | Zmiz1         | 34             |
| 25   | Rhoc          | 64             | Cd40          | 34             |
| 26   | Hmgcr         | 61             | Crip1         | 33             |
| 27   | Dynll1        | 60             | Cxcl16        | 33             |
| 28   | Esd           | 58             | Slc4a7        | 33             |
| 29   | Slc3a2        | 57             | Eps8          | 32             |
| 30   | Tnip1         | 56             | S100a6        | 30             |
| 31   | S100a6        | 55             | Rhoc          | 30             |
| 32   | Plek          | 55             | Ifrd1         | 29             |
| 33   | Sulf2         | 54             | Polr2e        | 29             |
| 34   | Crip1         | 52             | Fcgr1         | 29             |
| 35   | Ifrd1         | 49             | Ubc           | 27             |
| 36   | Ubc           | 49             | BC005537      | 27             |
| 37   | Cxcl16        | 49             | Slc3a2        | 26             |
| 38   | Fam162a       | 45             | Lgmn          | 26             |
| 39   | Mef2c         | 44             | Fam162a       | 25             |
| 40   | Exoc3l4       | 44             | Pik3r5        | 25             |
| 41   | Ier3          | 43             | Ier3          | 24             |
| 42   | BC005537      | 43             | Mrpl52        | 24             |
| 43   | Ubb           | 40             | Kdm6b         | 24             |
| 44   | Lgmn          | 40             | Srgn          | 24             |
| 45   | Eps8          | 39             | Pgam1         | 23             |
| 46   | Mrpl52        | 38             | Plek          | 23             |
| 47   | Btg2          | 37             | Tnip1         | 23             |
| 48   | Pik3r5        | 37             | Fosb          | 22             |
| 49   | Fcgr1         | 35             | Btg2          | 22             |
| 50   | Peli1         | 33             | Rrm2          | 22             |

Table S7: Precision, recall, and F1 score of long-term survivor classification results for cancer datasets

|           | Kidney      |             |             |             | Liver       |             |             |             | Pancreas    |             |             |             |
|-----------|-------------|-------------|-------------|-------------|-------------|-------------|-------------|-------------|-------------|-------------|-------------|-------------|
|           | DeepPIG     | DeepPINK    | All         | Random      | DeepPIG     | DeepPINK    | All         | Random      | DeepPIG     | DeepPINK    | All         | Random      |
| Precision | .592 ± .205 | .432 ± .261 | .391 ± .100 | .410 ± .270 | .647 ± .066 | .618 ± .105 | .662 ± .077 | .561 ± .106 | .569 ± .105 | .546 ± .210 | .550 ± .090 | .536 ± .099 |
| Recall    | .236 ± .140 | .120 ± .144 | .361 ± .128 | .109 ± .121 | .646 ± .157 | .579 ± .106 | .660 ± .107 | .628 ± .176 | .559 ± .219 | .479 ± .137 | .534 ± .122 | .563 ± .209 |
| F1        | .339 ± .129 | .265 ± .150 | .369 ± .106 | .242 ± .125 | .636 ± .076 | .592 ± .088 | .656 ± .073 | .582 ± .110 | .560 ± .127 | .504 ± .160 | .539 ± .100 | .542 ± .095 |
